# Supplementary material
Source: HighWire-hosted journal article supplement (https://rc.rcjournal.com/highwire/filestream/11924/field_highwire_adjunct_files/0/RC-02448.R2_HONG_Suppl.pdf)
Supplement: RC-02448.R2_HONG_Suppl.pdf [file RC-02448.R2_HONG_Suppl.pdf]

Table 1 The criteria of medical alert team activation

|             |                                                                                                                                                                                                        |
|-------------|--------------------------------------------------------------------------------------------------------------------------------------------------------------------------------------------------------|
| Airway      | Threatened, stridor                                                                                                                                                                                    |
| Breathing   | Respiratory distress (respiratory rate > 25 or < 8 per minute)                                                                                                                                         |
| Circulation | Systolic blood pressure < 90 or mean arterial blood pressure <60 mmHg<br>Unexplained pulse rate >130 or < 50 per minute<br>Sudden chest pain                                                           |
| Neurology   | Sudden mental change ( decrease in GCS of > 2 points)<br>Unexplained agitation<br>Unexplained seizures                                                                                                 |
| Oxygenation | PaO <sub>2</sub> < 55 mmHg or PaCO <sub>2</sub> > 50 mmHg<br>O <sub>2</sub> supply via nasal prong > 3 liters per minute or venturi mask > 30%                                                         |
| Other       | Unexplained metabolic acidosis<br>- pH < 7.3<br>- Lactate > 2 mmol/L<br>- Total CO <sub>2</sub> < 15 mmol/L<br>Hypoglycemia ( glucose < 50 mg/dL)<br>Bedside nurse concern about overall deterioration |

Table 2 Comparison between monitored and non-monitored in baseline characteristics of in-hospital cardiac arrest

|                                          | Monitored<br>(n = 135) | Non-monitored<br>(n = 103) | Total<br>(n = 238) | P-value |
|------------------------------------------|------------------------|----------------------------|--------------------|---------|
| Age                                      | 61.9 ± 15.1            | 57.4 ± 15.7                | 61.3 ± 15.2        | 0.117   |
| Sex, male                                | 81 (60)                | 61 (59.2)                  | 142 (59.7)         | 0.904   |
| Onset of event, daytime<br>(7AM to 11PM) | 98 (72.6)              | 72 (69.9)                  | 170 (71.4)         | 0.649   |
| Illness category                         |                        |                            |                    |         |
| Medical illness                          | 105 (77.8)             | 78 (75.7)                  | 183 (76.9)         | 0.710   |
| Underlying diseases                      |                        |                            |                    |         |
| Malignancy                               | 72 (53.3)              | 42 (40.8)                  | 114 (47.9)         | 0.055   |
| Chronic liver disease                    | 21 (15.6)              | 10 (9.7)                   | 31 (13)            | 0.184   |
| Chronic kidney disease                   | 16 (11.9)              | 22 (21.4)                  | 38 (16)            | 0.047   |
| Complicated DM                           | 13 (9.6)               | 16 (15.5)                  | 29 (12.2)          | 0.168   |
| Chronic lung disease                     | 5 (3.7)                | 7 (6.8)                    | 12 (5)             | 0.280   |
| Heart failure                            | 14 (10.4)              | 18 (17.5)                  | 32 (13.4)          | 0.111   |
| CVA                                      | 9 (6.7)                | 10 (9.7)                   | 19 (8)             | 0.391   |
| Peripheral vascular disease              | 7 (5.2)                | 7 (6.8)                    | 14 (5.9)           | 0.601   |
| Postoperative state                      | 70 (51.9)              | 52 (50.5)                  | 122 (51.3)         | 0.834   |
| Autoimmune disease                       | 5 (3.7)                | 1 (1)                      | 6 (2.5)            | 0.238   |
| Pre-existing conditions                  |                        |                            |                    |         |
| Malignancy                               | 70 (51.9)              | 47 (45.6)                  | 117 (49.2)         | 0.342   |
| Metastasis                               | 32 (23.7)              | 25 (24.3)                  | 57 (23.9)          | 0.919   |
| ACS prior                                | 14 (10.4)              | 20 (19.4)                  | 34 (14.3)          | 0.048   |

|                               |            |           |            |        |
|-------------------------------|------------|-----------|------------|--------|
| ACS present                   | 4 (3)      | 8 (7.8)   | 12 (5)     | 0.093  |
| Arrhythmia                    | 21 (15.6)  | 13 (12.6) | 34 (14.3)  | 0.522  |
| Non-stroke                    | 24 (17.8)  | 7 (6.8)   | 31 (13)    | 0.013  |
| Stroke                        | 3 (2.2)    | 5 (4.9)   | 8 (3.4)    | 0.297  |
| CHF prior                     | 10 (7.4)   | 13 (12.6) | 23 (9.7)   | 0.177  |
| CHF present                   | 8 (5.9)    | 14 (13.6) | 22 (9.2)   | 0.043  |
| Hypotension                   | 37 (27.4)  | 11 (10.7) | 48 (20.2)  | 0.001  |
| Vasopressor                   | 22 (16.3)  | 10 (9.7)  | 32 (13.4)  | 0.140  |
| Hypertension                  | 45 (33.3)  | 53 (51.5) | 98 (41.2)  | 0.005  |
| DM                            | 38 (28.1)  | 39 (37.9) | 77 (32.4)  | 0.112  |
| Hepatic insufficiency         | 30 (22.2)  | 9 (8.7)   | 39 (16.4)  | 0.005  |
| Pneumonia                     | 18 (13.3)  | 8 (7.8)   | 26 (10.9)  | 0.173  |
| Respiratory insufficiency     | 54 (40)    | 4 (3.9)   | 58 (24.4)  | <0.001 |
| Septicemia                    | 14 (10.4)  | 5 (4.9)   | 19 (8)     | 0.120  |
| Renal insufficiency           | 33 (24.4)  | 34 (33)   | 67 (28.2)  | 0.145  |
| Metabolic abnormality         | 27 (20)    | 6 (5.8)   | 33 (13.9)  | 0.002  |
| HIV infection                 | 1 (0.7)    | 0 (0)     | 1 (0.4)    | 1.000  |
| Interventions in place before |            |           |            |        |
| event                         |            |           |            |        |
| Vascular access               | 128 (94.8) | 88 (85.4) | 216 (90.8) | 0.013  |
| Supplement of oxygen          | 108 (80)   | 38 (36.9) | 146 (61.3) | <0.001 |
| IV vasoactive agent           | 27 (20)    | 12 (11.7) | 39 (16.4)  | 0.085  |
| Invasive airway*              | 34 (25.2)  | 3 (2.9)   | 37 (15.5)  | <0.001 |
| IV opioid agents              | 26 (19.3)  | 10 (9.7)  | 36 (15.1)  | 0.042  |

|                         |           |         |          |        |
|-------------------------|-----------|---------|----------|--------|
| Mechanical ventilation  | 15 (11.1) | 0 (0)   | 15 (6.3) | <0.001 |
| Intra-arterial catheter | 8 (5.9)   | 1 (1)   | 9 (3.8)  | 0.082  |
| Chest tube              | 2 (1.5)   | 3 (2.9) | 5 (2.1)  | 0.655  |
| IV antiarrhythmic agent | 4 (3)     | 0 (0)   | 4 (1.7)  | 0.135  |
| PCA                     | 0 (0)     | 3 (2.9) | 3 (1.3)  | 0.080  |
| Pacemaker, internal     | 0 (0)     | 2 (1.9) | 2 (0.8)  | 0.186  |
| ICD                     | 1 (0.7)   | 1 (1)   | 2 (0.8)  | 1.000  |

Data are presented as n (%).

ACS, acute coronary syndrome; CHF, congestive heart failure; CVA, cerebrovascular accidents; DM, diabetes mellitus; ECG, electrocardiography; HIV, human immunodeficiency virus; ICD, implantable cardioverter-defibrillator; and PCA, patient controlled analgesia

\*Invasive airway: tracheostomy in 12 and endotracheal intubation in 25.

Table 3 Comparison between monitored and non-monitored in in-hospital cardiac arrests characteristics

|                                 | Monitored<br>(n = 135) | Non-monitored<br>(n = 103) | Total<br>(n = 238) | P-value |
|---------------------------------|------------------------|----------------------------|--------------------|---------|
| First documented rhythm         |                        |                            |                    | 0.024   |
| Pulseless VT/VF                 | 17 (12.6)              | 17 (16.5)                  | 34 (14.3)          |         |
| PEA                             | 63 (46.7)              | 28 (27.2)                  | 91 (38.2)          |         |
| Asystole                        | 25 (18.5)              | 25 (24.3)                  | 50 (21)            |         |
| Unknown                         | 30 (22.2)              | 33 (32)                    | 63 (26.5)          |         |
| Immediate cause of event        |                        |                            |                    | 0.136   |
| Cardiac                         | 40 (29.6)              | 40 (38.8)                  | 80 (33.6)          |         |
| Pulseless VT/VF                 | 13 (9.6)               | 16 (15.5)                  | 29 (12.2)          |         |
| Acute coronary syndrome         | 4 (3)                  | 10 (9.7)                   | 14 (5.9)           |         |
| Acute pulmonary edema           | 9 (6.7)                | 5 (4.9)                    | 14 (5.9)           |         |
| Acute pulmonary embolism        | 8 (5.9)                | 1 (1)                      | 9 (3.8)            |         |
| Other*                          | 5 (3.7)                | 7 (6.8)                    | 12 (5)             |         |
| Unknown                         | 1 (0.7)                | 1 (1)                      | 2 (0.8)            |         |
| Non-cardiac                     | 95 (70.4)              | 63 (61.2)                  | 158 (66.4)         |         |
| Cerebrovascular                 | 4 (3)                  | 2 (1.9)                    | 6 (2.5)            |         |
| Asphyxia/Airway problem         | 15 (11.1)              | 22 (21.4)                  | 37 (15.5)          |         |
| Hypovolemic shock               | 22 (16.3)              | 13 (12.6)                  | 35 (14.7)          |         |
| Septic shock                    | 24 (17.8)              | 3 (2.9)                    | 27 (11.3)          |         |
| Acute respiratory insufficiency | 24 (17.8)              | 17 (16.5)                  | 41 (17.2)          |         |
| Anaphylaxis                     | 5 (3.7)                | 4 (3.9)                    | 9 (3.8)            |         |
| Other†                          | 1 (0.7)                | 2 (1.9)                    | 3 (1.3)            |         |
| Arrived time, min               | 1 (0.5-2)              | 1 (0.5-2)                  | 1 (0.5-2)          | 0.485   |
| Duration of CPR, min            | 12 (5-30)              | 20 (10-38)                 | 14 (5-32)          | 0.096   |
| Duration of CPR, min            |                        |                            |                    | 0.113   |
| 0-15                            | 23 (17)                | 29 (28.2)                  | 126 (52.9)         |         |
| 15-35                           | 35 (25.9)              | 25 (24.3)                  | 60 (25.2)          |         |
| >35                             | 77 (57)                | 49 (47.6)                  | 52 (21.8)          |         |
| ROSC, min                       | 11 (5-20)              | 16 (6.25-27.5)             | 12 (5-21)          | 0.188   |

|                                            |            |            |            |       |
|--------------------------------------------|------------|------------|------------|-------|
| Pharmacologic treatments                   |            |            |            |       |
| Epinephrine                                | 125 (92.6) | 92 (89.3)  | 217 (91.2) | 0.378 |
| Atropine                                   | 109 (80.7) | 87 (84.5)  | 196 (82.4) | 0.455 |
| Fluid bolus                                | 103 (76.3) | 88 (85.4)  | 191 (80.3) | 0.079 |
| Sodium bicarbonate                         | 25 (18.5)  | 33 (32)    | 58 (24.4)  | 0.016 |
| Calcium chloride/gluconate                 | 11 (8.1)   | 11 (10.7)  | 22 (9.2)   | 0.504 |
| Amiodarone                                 | 5 (3.7)    | 10 (9.7)   | 15 (6.3)   | 0.059 |
| Other <sup>‡</sup>                         | 14 (5.9)   | 1 (2.9)    | 15 (6.3)   | 0.704 |
| Interventions at time of event             |            |            |            |       |
| Bag-valve-mask                             | 133 (98.5) | 101 (98.1) | 234 (98.3) | 1.000 |
| Intubation                                 | 84 (62.2)  | 83 (80.6)  | 167 (70.2) | 0.002 |
| Laboratory                                 | 44 (32.6)  | 47 (45.6)  | 91 (38.2)  | 0.040 |
| Blood sugar test                           | 34 (25.2)  | 32 (31.1)  | 66 (27.7)  | 0.315 |
| Defibrillation                             | 27 (20)    | 26 (25.2)  | 53 (22.3)  | 0.335 |
| Vasoactive infusion                        | 26 (19.3)  | 15 (14.6)  | 41 (17.2)  | 0.342 |
| Documentation of invasive airway placement |            |            |            | 0.762 |
| Auscultation                               | 57 (67.9)  | 55 (66.3)  | 112 (67.1) |       |
| Capnography                                | 22 (26.2)  | 23 (27.7)  | 45 (26.9)  |       |
| Esophageal detector device                 | 5 (6)      | 5 (6)      | 10 (6)     |       |

Data are presented as n (%).

\*Other causes: aortic dissection in 3, rupture of aneurysm in 2, air embolism in 2, other arrhythmia in 2, related to procedure in 1, and progression of aortic stenosis in 1.

<sup>†</sup>Other causes: metabolic acidosis in 2 and hypoglycemia in 1.

<sup>‡</sup>Other: magnesium sulfate in 9, vasopressin in 5, lidocain in 2, and intravenous 50% dextrose in 2.

CPR, cardiopulmonary resuscitation; PEA, pulseless electrical activity; ROSC, return of spontaneous circulation; and VT/VF, ventricular tachycardia/ventricular fibrillation.

Table 4 Comparison between monitored and non-monitored in outcomes of in-hospital cardiac arrests

|                                | Monitored<br>(n = 135) | Non-monitored<br>(n = 103) | Total<br>(n = 238) | P-value |
|--------------------------------|------------------------|----------------------------|--------------------|---------|
| ROSC, achieved                 | 87 (64.4)              | 64 (62.1)                  | 151 (63.4)         | 0.714   |
| Survival to hospital discharge | 22 (16.3)              | 24 (23.3)                  | 46 (19.3)          | 0.175   |

Data are presented as n (%)

ROSC, return of spontaneous circulation

Table 5 Comparison of preventable and nonpreventable cases according to preexisting conditions

| Preexisting condition     | Preventable (n = 91) | Nonpreventable (n = 147) | <i>p</i> |
|---------------------------|----------------------|--------------------------|----------|
| Cancer                    | 50 (55)              | 67 (46)                  | 0.160    |
| Metastatic cancer         | 33 (36)              | 24 (16)                  | < 0.001  |
| ACS prior                 | 8 (9)                | 26 (1)                   | 0.057    |
| ACS present               | 2 (2)                | 10 (7)                   | 0.138    |
| Arrhythmia                | 7 (8)                | 27 (18)                  | 0.022    |
| Acute mental change       | 19 (21)              | 12 (8)                   | 0.005    |
| Stroke                    | 3 (3)                | 5 (3)                    | 1.000    |
| CHF prior                 | 8 (9)                | 15 (10)                  | 0.720    |
| CHF present               | 1 (1)                | 21 (14)                  | 0.001    |
| Hypotension               | 20 (22)              | 28 (19)                  | 0.584    |
| Vasopressor               | 8 (9)                | 24 (16)                  | 0.098    |
| Hypertension              | 28 (31)              | 70 (48)                  | 0.010    |
| DM                        | 33 (36)              | 44 (30)                  | 0.310    |
| Hepatic insufficiency     | 17 (19)              | 22 (15)                  | 0.458    |
| Pneumonia                 | 13 (14)              | 13 (9)                   | 0.191    |
| Respiratory insufficiency | 37 (41)              | 21 (14)                  | < 0.001  |
| Septicemia                | 8 (9)                | 11 (8)                   | 0.717    |
| Renal insufficiency       | 26 (27)              | 41 (28)                  | 0.910    |
| Metabolic abnormality     | 24 (26)              | 9 (6)                    | < 0.001  |
| HIV                       | 1 (1)                | 0 (0)                    | 0.382    |

Data are presented as n (%).

ACS, acute coronary syndrome; CHF, congestive heart failure; CVA, cerebrovascular accidents; DM, diabetes mellitus; ECG, electrocardiography; and HIV, human immunodeficiency virus.
